# Supplementary material
Source: MDPI journal article supplement (https://www.mdpi.com/1999-4907/13/12/1991)
Supplement: s1 [file s1]

**Supplementary Materials**

Table S1. Basic properties of the damage classes adopted in the study.

| Degree of damage category | Degree of damage (%) | Area of damage (in ha) | Percent of the total area of damage (%) | Number of observations | Percent of the total number of observations (%) |
|---------------------------|----------------------|------------------------|-----------------------------------------|------------------------|-------------------------------------------------|
| 0.9                       | $\geq 80\%$          | 102313.16              | 11.69                                   | 2973                   | 13.70                                           |
| 0.7                       | 60% - 80%            | 58154.54               | 6.64                                    | 3305                   | 15.24                                           |
| 0.5                       | 40% - 60%            | 66208.77               | 7.57                                    | 3505                   | 16.16                                           |
| 0.3                       | 20% - 40%            | 76390.13               | 8.73                                    | 3896                   | 17.96                                           |
| 0.1                       | $\leq 20\%$          | 479308.46              | 54.77                                   | 5924                   | 27.31                                           |
| NA                        | NA                   | 92802.58               | 10.60                                   | 2088                   | 9.63                                            |
| $\Sigma$                  | $\Sigma$             | 875177.7               | 100                                     | 21691                  | 100                                             |

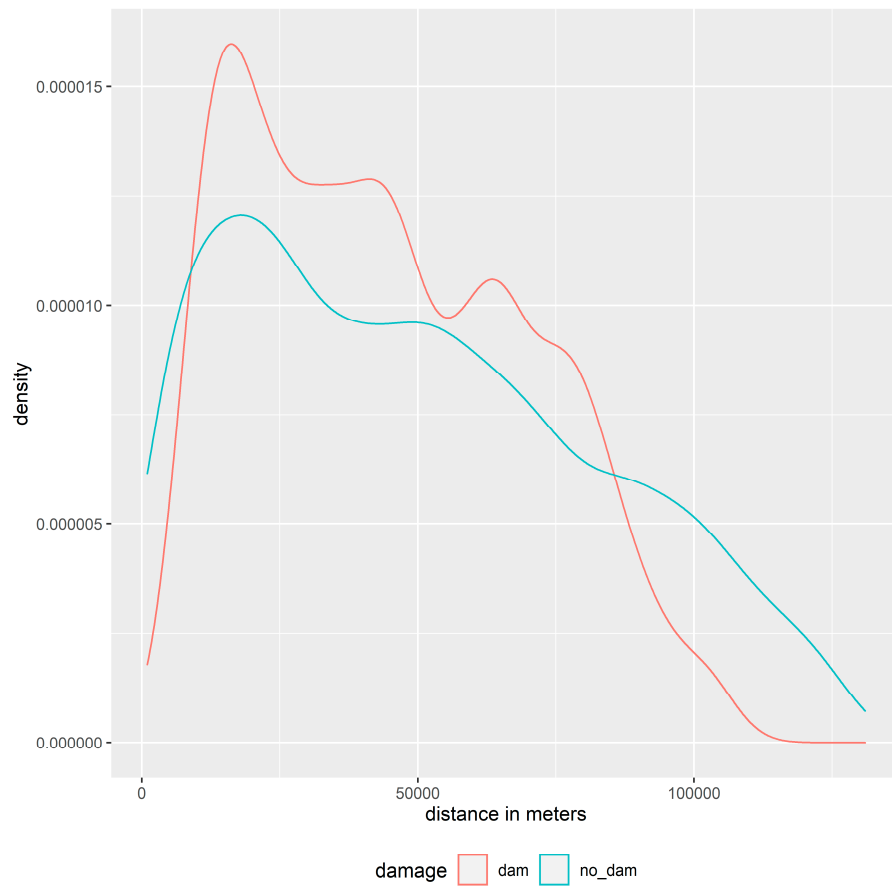

Figure S1. Density function of the distance from the Atlantic coastline displayed for the two classes of the binary response variable. Abbreviations: dam – damage class, no\_dam – places with no damage class.
